# Supplementary material
Source: PubMed Central journal article supplement (PMC7093144)
Supplement: IAI.00362-19-s0001.pdf [file IAI.00362-19-s0001.pdf]

Fig. S1

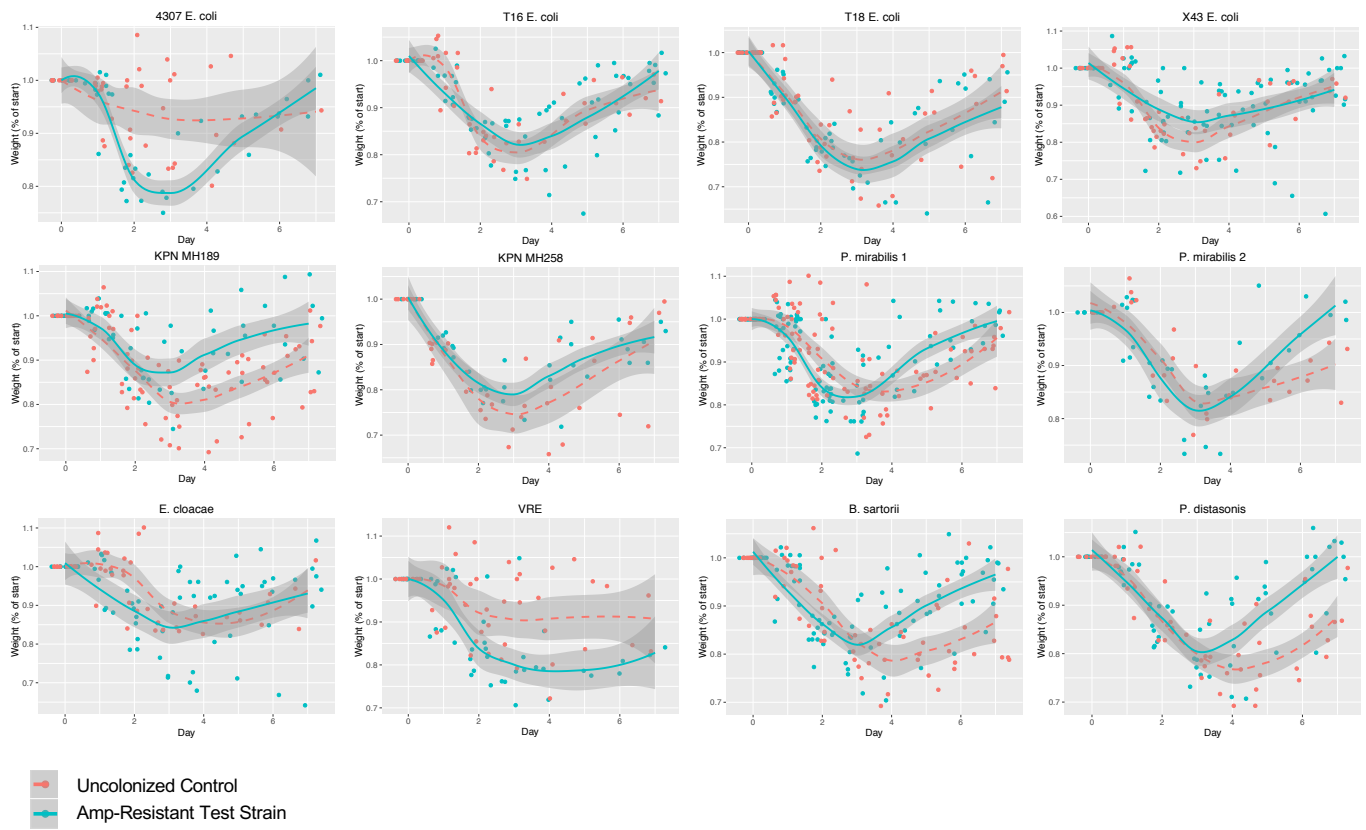

Fig. S2

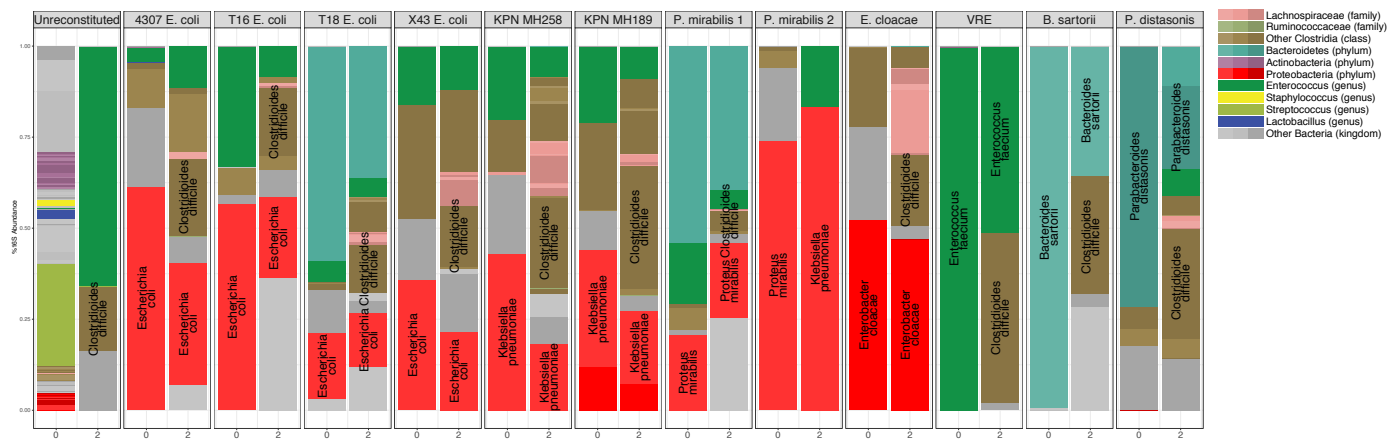

Fig. S3

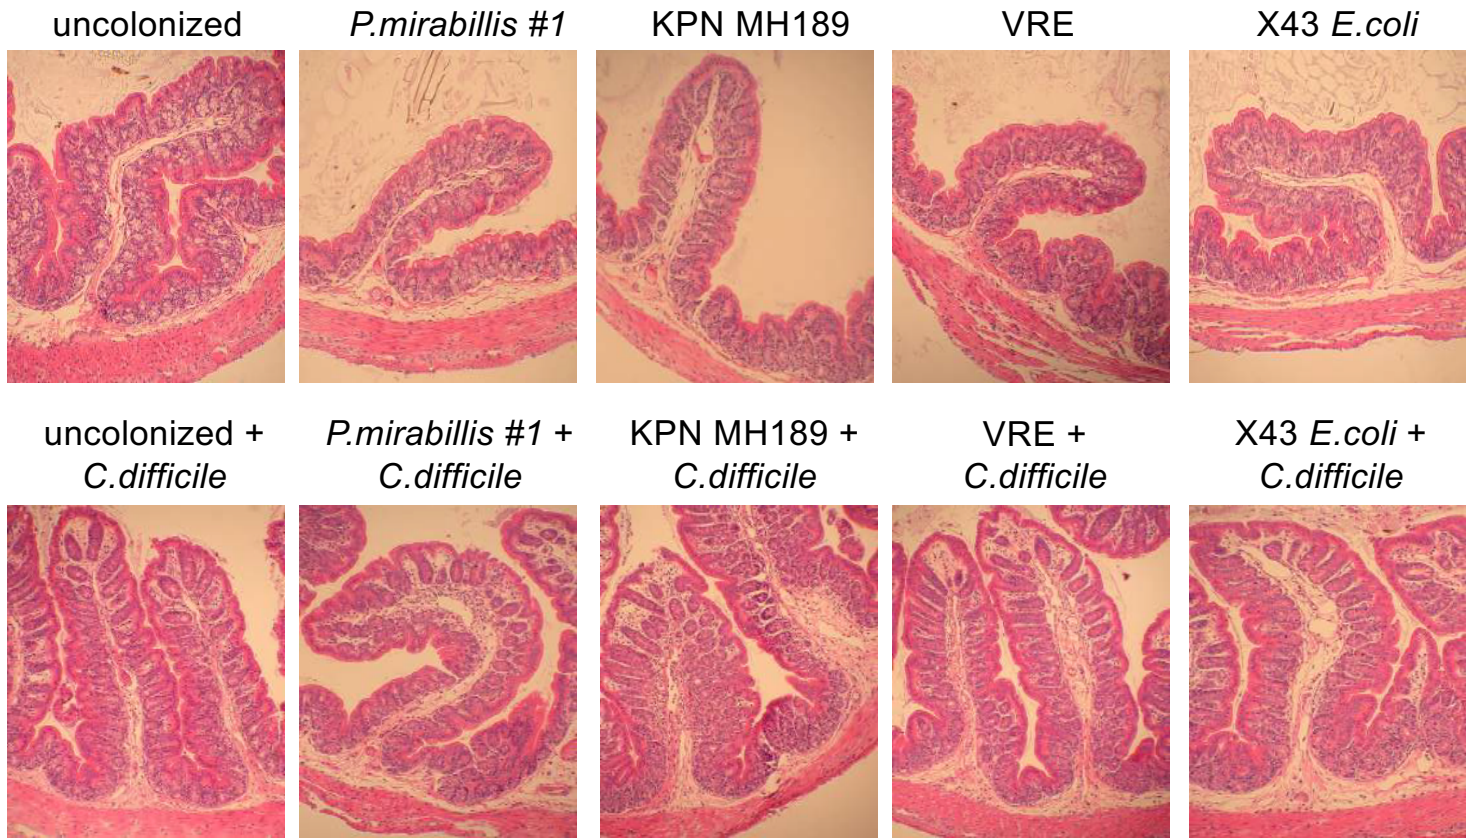

Fig. S4

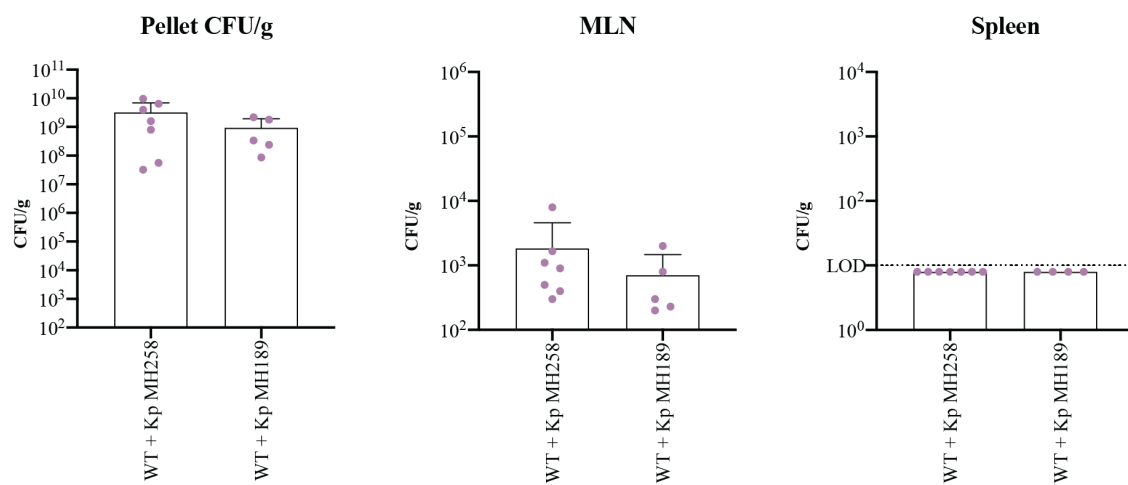

**Figure S1. Influence of the residual microbiota on weight loss following CDI.**

C57BL/6 mice were infected with 200 spores of *C. difficile* (VPI10463 strain) following ampicillin pretreatment and were assessed for weight loss and recovery following infection. Data representative of 17 independent experiments.

**Figure S2. Changes in mouse microbiota composition following *C. difficile* infection.**

C57BL/6 mice were infected with 200 spores of *C. difficile* (VPI 10463 strain) following MNV and ampicillin pretreatment. DNA was extracted from fecal pellets and subjected to 16S rRNA PCR amplification and sequencing of the V4-V5 region. The average relative abundance of bacterial taxa for all mice of the same group is plotted both on day 0 and day 2 post infection.

**Figure S3. Residual microbiota did not impact tissue histology following CDI.**

C57BL/6 mice were infected with 200 spores of *C. difficile* (VPI 10463 strain) following MNV and ampicillin pretreatment and euthanized 2 days later. Pictured are representative H&E-stained cecal sections from antibiotic-treated mice colonized with different ampicillin-resistant bacterial strains in the presence or absence of *C. difficile* infection.

**Figure S4. *K. pneumoniae* MH189 dissemination in the absence of *C. difficile***

C57BL/6 mice were treated with ampicillin for 4 days and inoculated with 1x10<sup>3</sup> CFUs of *K. pneumoniae* MH189 and MH258 via oral gavage. Fecal, mLN and spleen samples were collected 3 days post inoculation and CFUs were quantified by plating on selective agar.
